# Supplementary material
Source: publisher figshare collection journal article supplement (https://sage.figshare.com/ndownloader/files/15103484)
Supplement: Supplementary file 1 [file 15103484]

## Supplementary Information

### Multiple Damage Detections in Plate-like Structures using CMS and GSM

Saeed Ahmad<sup>^</sup>, Aashir Waleed<sup>#\*</sup>, Umar Siddique Virk<sup>^</sup>, Muhammad Tanveer Riaz<sup>#</sup>, Aamish Sharjeel<sup>^</sup>, Nasir Ahmad<sup>^</sup>

<sup>^</sup>Department of Mechatronics and Control Engineering, University of Engineering and Technology, Lahore, Pakistan

<sup>#</sup> Department of Electrical Engineering, University of Engineering and Technology, Lahore (Faisalabad Campus), Pakistan

\*corresponding author: [aashir.walid@uet.edu.pk](mailto:aashir.walid@uet.edu.pk)

The proposed method can successfully detect the multiple damages (even more than two damages). The case study with three diamond shaped damages has been provided below in **Figure S1**. Three square damage area of size is 0.17 x 0.17 m with depth of 0.02 m located centrally at (x, y) = (0.405, 0.485) m, (x, y) = (0.805, 0.485) m and (x, y) = (1.385, 0.585) m at an angle of 45° at x-axis (as shown in **Figure S1** ).

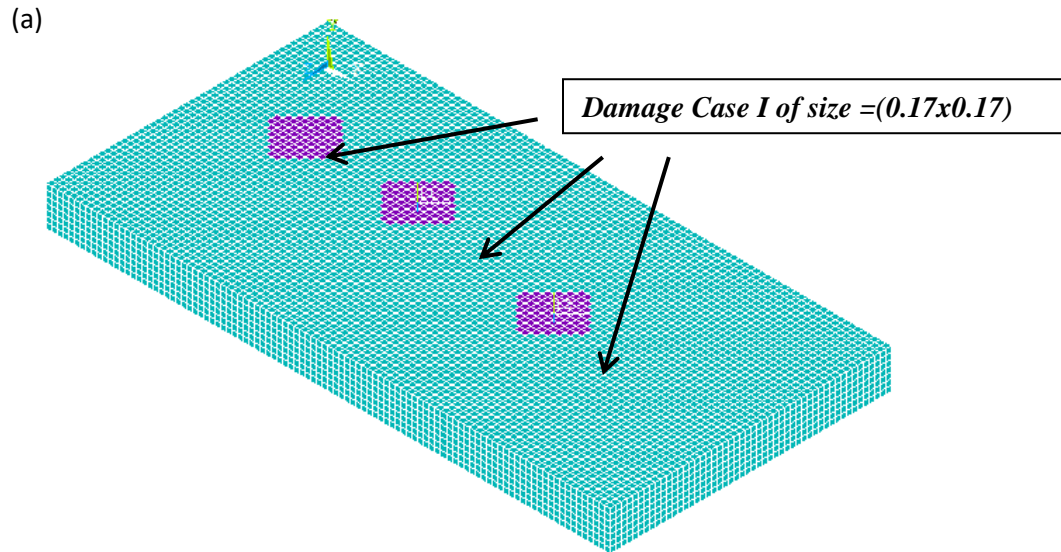

(b)

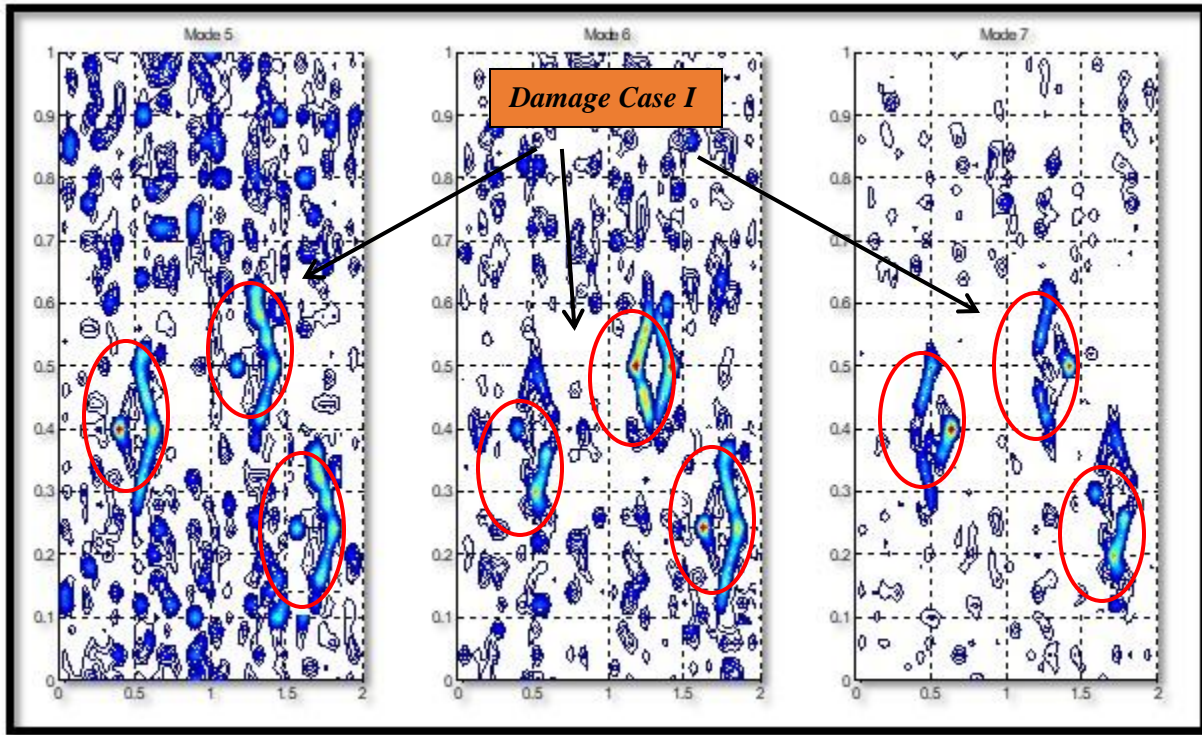

Figure S1: (a) Diamond shape damages (0.17 m x 0.17 m) in plate. (b) MATLAB Results: Detection of damages case I by 5<sup>th</sup>, 6<sup>th</sup> and 7<sup>th</sup> modes – noise-free case.
